# Supplementary material
Source: HighWire-hosted journal article supplement (http://www.jneurosci.org/highwire/filestream/600019/field_highwire_adjunct_files/2/Figure_S3.pdf)
Supplement: Figure_S3.pdf [file Figure_S3.pdf]

$\alpha 1(Y368X)\beta 2\gamma 2S$ 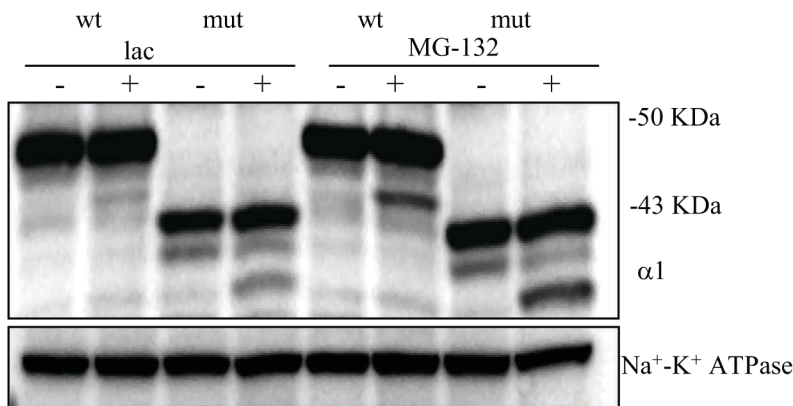

Ratio of total  $\alpha 1$  subunit IDVs after lac or MG-132 treatment vs IDVs before treatment (Calcium transfection)

B

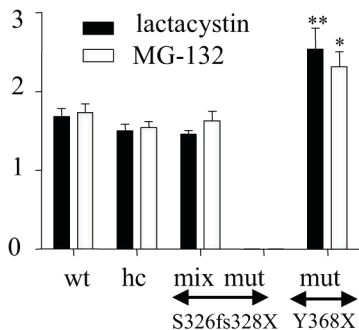

**Supplementary Figure 3. The mutant  $\alpha 1(Y368X)$  protein, the NMD-insensitive  $\alpha 1$  minigene subunit protein was increased with proteasome inhibition.**

(A) HEK 293T cells were cotransfected with  $\beta 2$  and  $\gamma 2S$  subunit cDNAs and wild-type  $\alpha 1$  subunit minigene (ratio of 1:1:1, (wt) or mut  $\alpha 1(Y368X)$  subunit minigene (ratio of 1:1:1 (mut). The cells were incubated with or without lactacystin (10  $\mu M$ ) (left) or MG-132 (3 $\mu M$ ) (right) for 6 hr before harvest. The total cell lysates (15  $\mu g$ /lane) were analyzed by 10% SDS-PAGE. With proteasomal inhibition, there was an increase in the  $\alpha 1(Y368X)$  subunit main band (43 KDa) and appearance of a third band that was likely an unglycosylated form of the mutant band or a degraded fragment. (B) The histogram displays the ratio of increase of protein with lactacystin or MG-132 treatment over the protein without treatment. The treatment with either lactacystin or MG-132 increased the total wild-type  $\alpha 1$  subunit expression in wt, hc and mixed conditions and mutant  $\alpha 1(Y368X)$  subunit protein expressions. There was no mutant  $\alpha 1(S326fs328X)$  protein detected by Western blot either before or after lactacystin or MG-132 treatments (\*  $p < 0.05$ , \*\* $p < 0.01$  vs wild-type  $n = 4$ ).
